# Supplementary material for: Virus-mediated delivery of antibody targeting TAR DNA-binding protein-43 mitigates associated neuropathology
Source: JCI journal article supplement (doi:10.1172/jci123931), 2019-01-22
Supplement: sd1 [file 1]

## 1    **Supplementary Materials and Methods**

### 2    *UV-CLIP*

3    Hek293 cells were plated on 10 cm dishes and transfected with pscFv9 vectors. After 48h cells were  
4    irradiated with UV (15000 µjoule, Stratalinker, Stratagene), harvested, lysated in NT2 Buffer (Tris  
5    pH7.4 50mM, NaCl 150mM, MgCl<sub>2</sub> 1mM, 0.5%, protein solubilizer 40 (A.G. Scientific), RNasin  
6    (Promega), Supersasin (Ambion) and proteases inhibitors (Sigma)) with 5-6 passages in 27G needle  
7    syringe and centrifuged at 14000 rpm for 10min. Supernatant (0.8 mg) were incubated overnight at  
8    4°C with the precoated beads. Dynabeads-G (Invitrogen) were blocked overnight in NT2 - 5% BSA  
9    without inhibitors and then precoated with 2.6 µg anti-TDP-43 antibody (Proteintech) or normal  
10   rabbit IgGs (Santa Cruz) overnight at 4°C. After four washes with NT2 Buffer, beads were treated  
11   with 0.1mg of proteinase K (Promega) in Tris 100mM pH 7.4, NaCl 50mM, EDTA 10mM for  
12   15min at 56°C. An aliquot was taken for western blot analyses before proteinase K digestion.  
13   RNAs were purified from beads using Trizol (Thermo Fisher Scientific) according to the  
14   manufacturer's instructions. The RNA quality and the absence of genomic DNA was verified by  
15   Bioanalyser (Agilent). Maxima H minus RT (Thermo Fisher Scientific) was used for the reverse  
16   transcription of RNA to cDNA with oligo(dT) and random primers. Human *TDP-43* was amplified  
17   by RT-PCR on 20ng cDNA with Taq polymerase (Feldan Therapeutics) and the following primers  
18   rev: 5' AACCCCTTTGAATGACCAGTCTTA, fwd: 5' GCTGGGGAAATCTGGTGTATG. A  
19   240bp amplicon was visualized on an agarose gel with ethidium bromide (Sigma) on a GelDoc  
20   (Bio-Rad) apparatus.

21

### 22   *Cell survival assay*

23   Cell viability was assessed using MTS assay, as per the manufacturer's instructions (Promega).  
24   Absorbance was read at 490 nm using an EnSpire 2300 Multilabel reader (Perkin Elmer).

25

26 *Luciferase assay*

27 Assay was performed as previously published (1) using the Bright-Glo Luciferase assay system  
28 (Promega), according to the manufacturer's instructions. Results were expressed as luciferase  
29 activity (RLU)/ $\mu$ g cellular protein measured by BCA quantification (Bio-Rad).

30

31 *DCHFDA assay*

32 Assay was performed as previously published (2). Cells were incubated with dichlorofluorescein  
33 diacetate (Sigma) reagent for 1 hour in the dark and then lysated. Fluorescence (ex 485nm, em  
34 535nm) was measured by in a TriStar2 (Berthold Technologies) plate reader. Results were  
35 expressed as Abs/ $\mu$ g cellular protein measured by BCA quantification (Bio-Rad).

36

37 *Western and Dot blot*

38 Equal amount of proteins (generally 20-30  $\mu$ g) were resuspended in loading buffer supplemented  
39 with DTT (Sigma) 1mM, boiled 5 min at 100°C, loaded on 12% acrylamide home-made gels or  
40 precast gels (Bio-Rad) and transferred on PVDF membranes (Millipore). Dot blot were performed  
41 by loading equal amount of proteins or volumes of media on a PVDF membrane by vacuum  
42 filtration using the Dot-Blot apparatus (Bio-Rad). Membranes were incubated 1 h with blocking  
43 solution (BSA 3% or Milk 5% in TBS-Tween 0.1%), and then overnight in primary antibody  
44 diluted in blocking solutions (Supplementary Table 1), washed in TBS-Tween and incubated 2 h in  
45 secondary antibodies and finally washed in TBS-Tween. Goat anti-mouse HRP, goat anti-rabbit  
46 HRP or donkey anti-goat HRP (Jackson ImmunoResearch) secondary antibodies were diluted  
47 1:5000 in blocking, whereas IRDye-conjugated (Li-Cor) secondary antibodies were diluted 1:10000  
48 in TBS-Tween and incubated in dark. Signal was acquired by exposing membranes to X-ray film  
49 (Biomax MR, Kodak) or using the Li-Cor sistem (Li-Cor Biotechnology). Total transfered proteins  
50 (TTP) were stained by incubation of membranes 5 min in Ponceau solution (Sigma) and washes in  
51 distilled water or by UV-acquisition of Stain Free staining (Bio-Rad) on membrane (3, 4).

52 Pictures of developed X-Ray films and Ponceau stained membranes were acquired by GelDoc  
53 system (Bio-Rad). Densitometry was done by Image Lab (Bio-Rad) or Image Studio Lite 4.0 (Li-  
54 Cor) softwares.

55

56 *Cytokines array*

57 The cytokine array was performed as previously described (1). Briefly, samples, i.e. 300 µg of  
58 soluble cytoplasmic portion from mice tissues, were incubated with array membranes from mouse  
59 cytokine array kit (Raybio) and results were obtained according to manufacturer's instructions.

60

61 **Supplementary Figure 1**

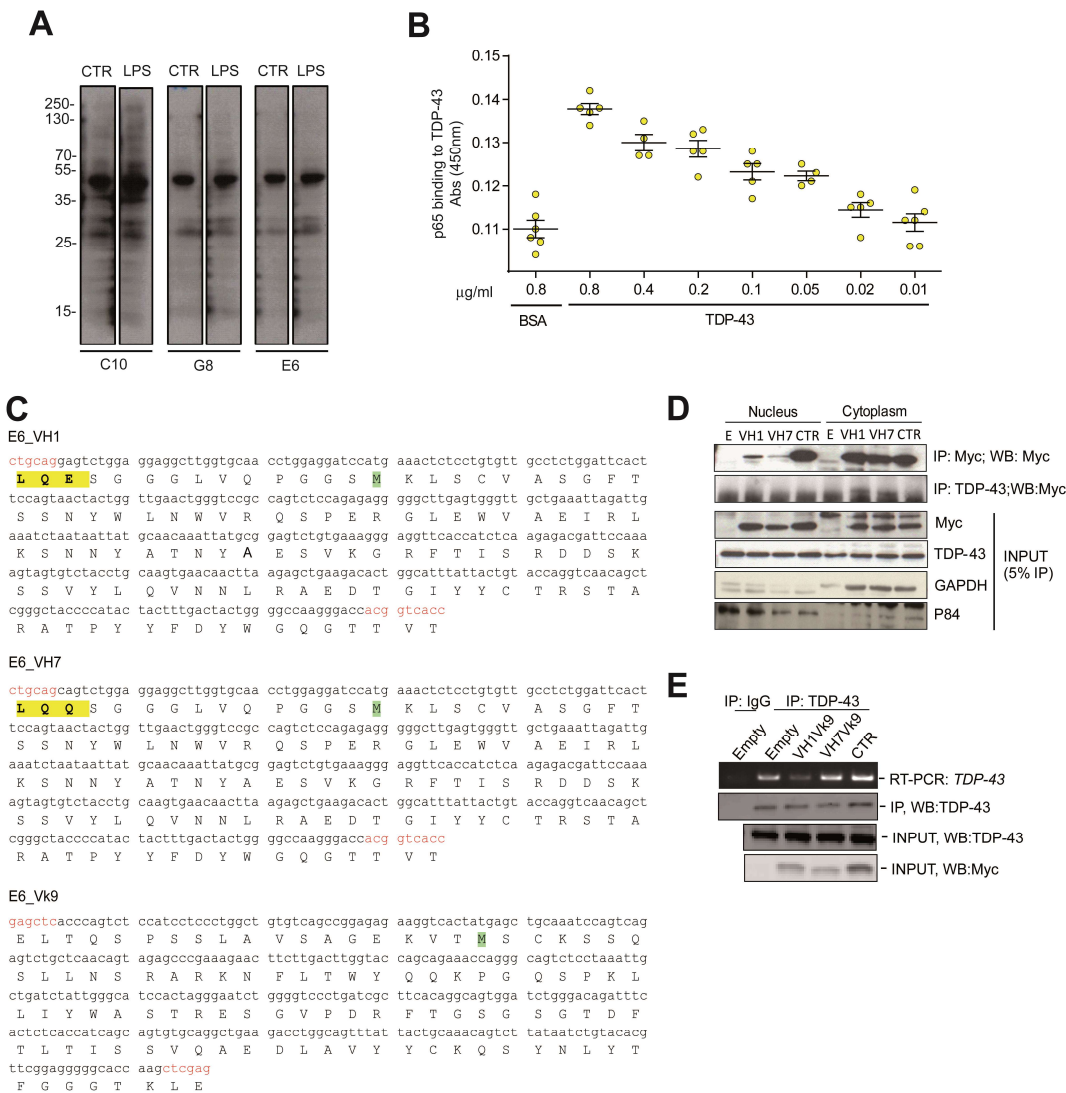

**Suppl. Fig. 1 Selection and characterization of monoclonal and scFv antibodies.** (A) Selection of monoclonal antibodies able to recognize TDP-43. Representative picture of western blot (replicated twice) of nuclear extracts of BV2 microglial cells treated with or without LPS and probed with monoclonal antibodies named C10, G8 and E6. (B) Elisa assay demonstrating the direct protein-protein interaction between TDP-43 and p65. Different concentrations of TDP-43 and BSA, as control, were incubated with p65 His-Tag, n=4-6 wells per condition, One-way Anova  $p<0.0001$  and  $p<0.0001$  by post test for linear trend. (C) Nucleic acid and amino acid sequence of E6 derived variable heavy chains (VH1 and VH7) and light chains (Vk9) used for the production of single chain antibodies. Digestion enzymes sequences are labelled in red, methionine in green and the amino acids difference between VH1 and VH7 are highlighted in yellow. (D) VH1Vk9 and VH7Vk9 specifically recognize TDP-43 in the cytoplasm. Representative picture of TDP-43 and scFv immunoprecipitation in nuclear and cytoplasmic fractions of Hek293 pscFv9-transfected cells. Experiment was replicated three times. Anti-myc antibody was used for scFv detection, GAPDH and p84 were used as fractions markers. (E) VH1Vk9 but not VH7Vk9 alters the interaction between TDP-43 and its RNA. UV-CLIP experiment performed in Hek293 transfected cells. Representative picture of RT-PCR and western blot for *TDP-43* performed on cDNA and proteins immunoprecipitated with anti-TDP-43 antibody- or normal IgG- coated beads. Presence of TDP-43 and scFv (myc) was confirmed by western blot on 20μg input. Experiment was replicated at least 3 times. E=Empty, no scFv; CTR, D1.3 scFv. Graph shows mean  $\pm$  sem.



83 **Supplementary Figure 2**

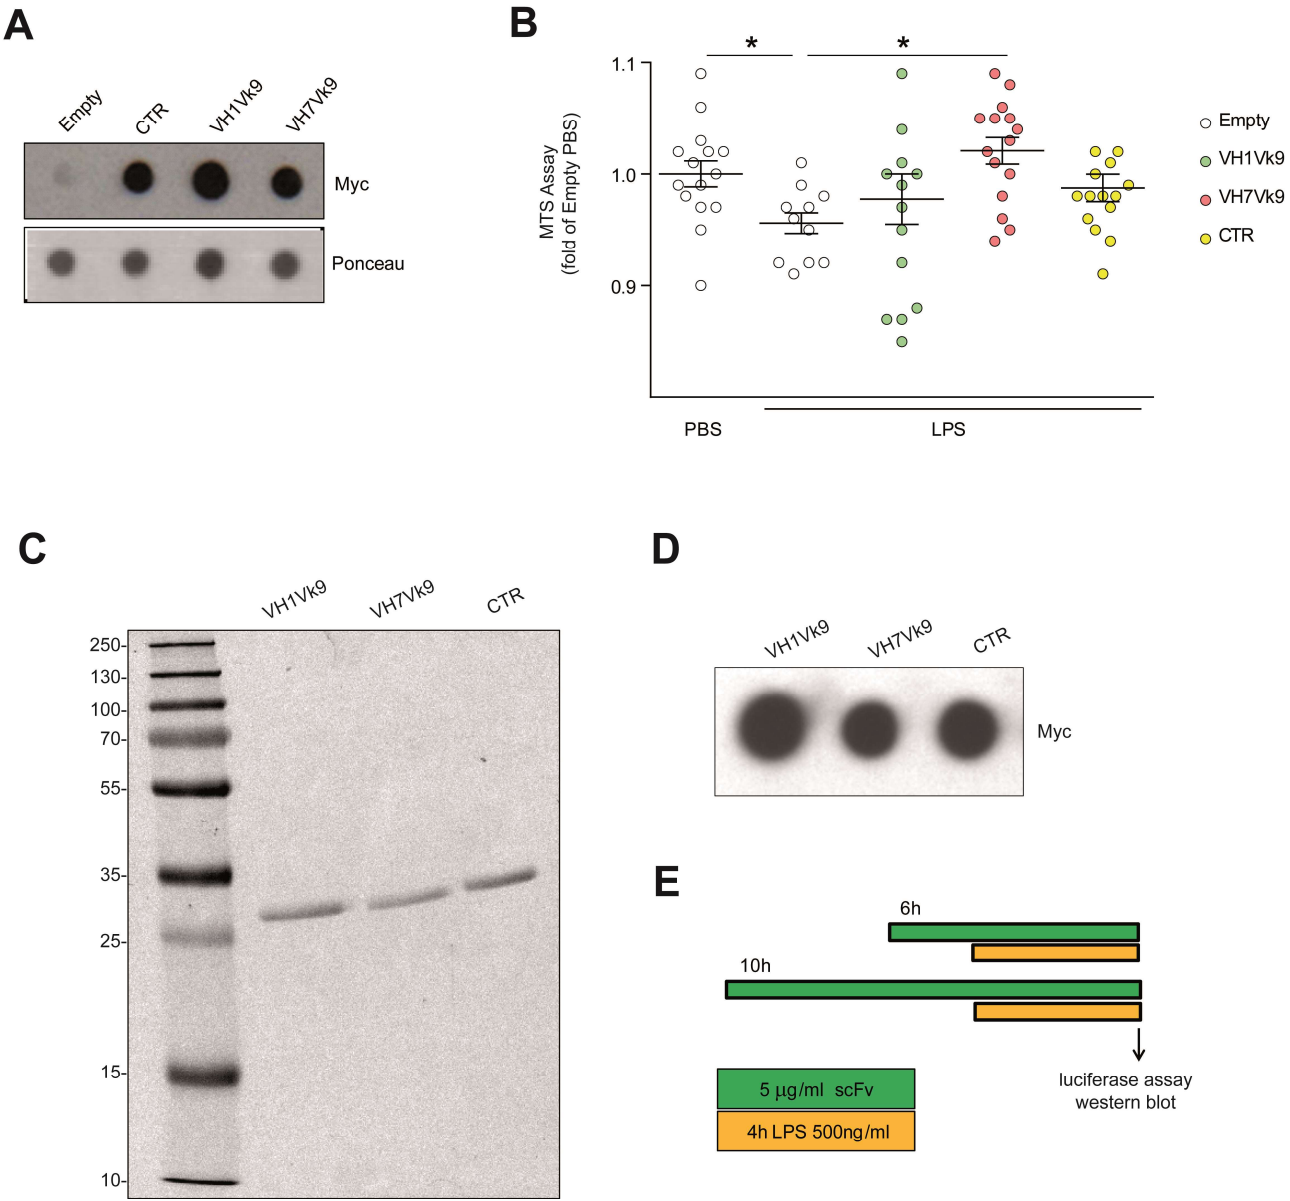

84  
85  
86 **Suppl. Fig. 2 Single chain antibodies purification and effect on microglial-mediated toxicity**  
87 **toward neurons.** (A) Representative picture of dot blot experiment showing the presence of scFv in  
88 the media of transfected cells. Western blot was performed by anti-myc antibody and Ponceau was  
89 used as loading reference. Experiment was repeated more than three times. (B) N2A cells were  
90 treated with media of transfected BV2 cells stimulated for 4 hours with LPS. Viability of N2A cells  
91 was assessed by MTS assay in n=12-15 samples (dots) from 3 independent experiments (4-5 wells  
92 each), One-way Anova p=0.0451, \* p<0.05 by Sidak's multiple comparison test. (C) Purified scFv  
93 can be detected by Coomassie staining. 1 µg of purified scFv was loaded on a 12% acrylamide gel  
94 and subsequently stained with Coomassie. One unique band at 28kDa corresponding to scFv can be  
95 detectable. Experiment was repeated more than three times. (D) Representative dot blot experiment  
96 where 1 µg of purified scFv was loaded and blotted with anti-myc-HRP antibody. Experiment was  
97 repeated more than three times. (E) Representative schema of BV2 cells treatment. Cells were  
98 treated for 6 h or 10 h with scFv, or untreated with any scFv, together with 4h LPS, luciferase assay  
99 and western blot were performed soon after. Empty, no scFv; CTR, D1.3 scFv. Graph shows mean  
100 ± sem.

101 **Supplementary Figure 3**

**A**

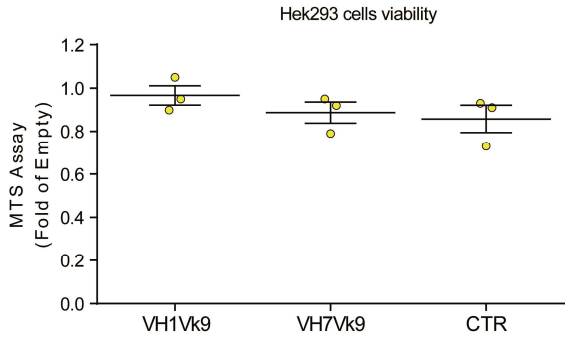

**B**

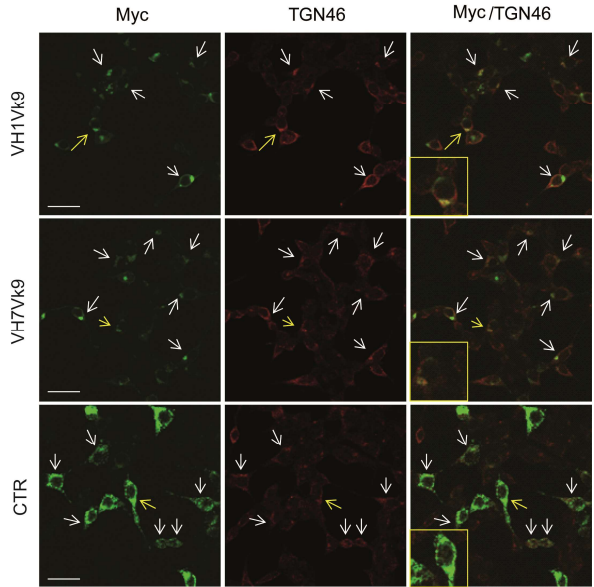

**C**

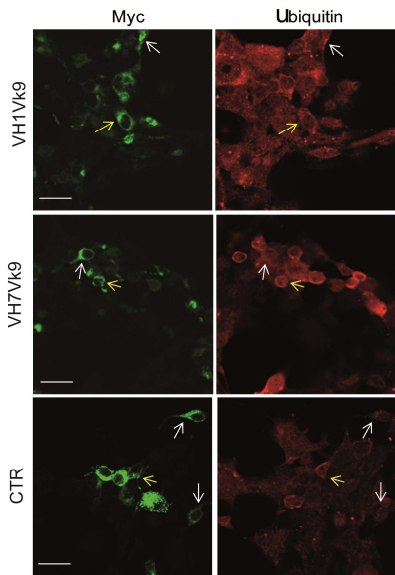

**D**

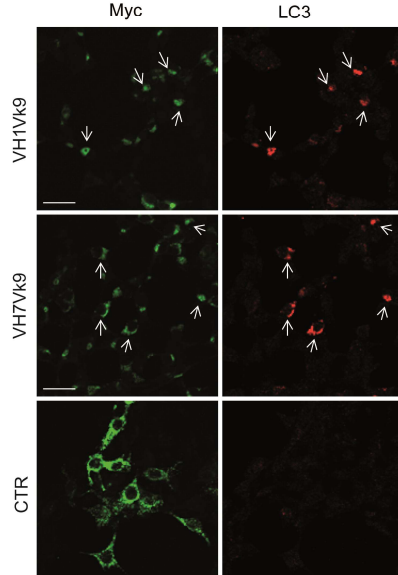

**Suppl. Fig. 3 ScFv did not alter cell viability of transfected cells. (A)** Survival assay on Hek293 pscFv9-transfected cells. Viability of cells was assessed by MTS assay on n=3 independent experiments (dots), One-way Anova p=0.174. Data are expressed and fold of Empty. **(B)** Representative images of immunofluorescence for scFv (myc, green) and the trans-Golgi network (TGN46, red) and merge. Arrows show cells with co-localization, yellow arrow shows cells enlarged 2.5 times in merge. Scale bar = 20 μm. **(C)** Representative images of single channel immunofluorescence for scFv (myc, green) and ubiquitin (red) corresponding to merged images in figure 3B. Arrows show cells with co-localization, yellow arrow shows cells enlarged 2.5 times in figure 3B. Scale bar = 20 μm. **(D)** Representative images of single channel immunofluorescence for scFv (myc, green) and LC3 (red) corresponding to merged images in figure 3C. Arrows show cells with co-localization, yellow arrow shows cells enlarged 2.5 times in figure 3C. Scale bar = 20 μm. Empty, no scFv; CTR, D1.3 scFv. Graph shows mean ± sem.

**A**

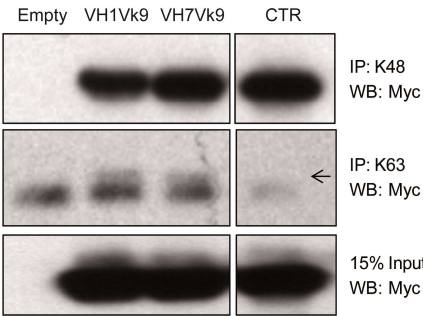

**B**

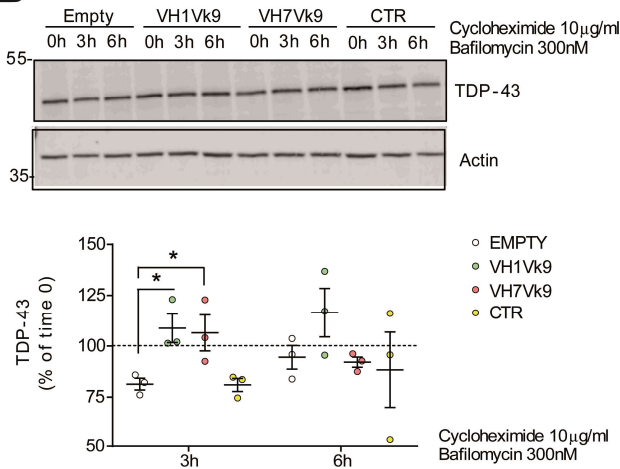

**C**

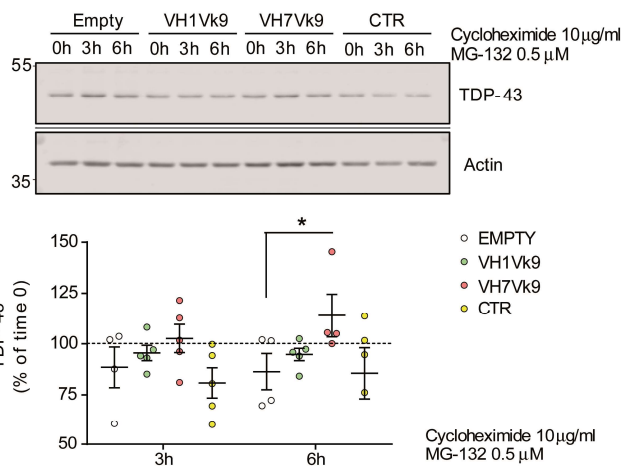

**Suppl. Fig. 4 ScFv mediated TDP-43 degradation through proteasome and autophagy pathways.**

**(A)** Representative picture of immunoprecipitation for all K48- (proteasome) or K63-

(autophagy) poly-ubiquitinated proteins and western blot for myc. Experiment was repeated three

times. Lanes were run on the same gel but were noncontiguous. **(B,C)** Representative picture of

western blot for TDP-43 and quantification in Hek293 pscFv9-transfected cells treated with

cycloheximide 10 µg/ml and bafilomycin 300nM **(B)** or MG-132 0.5 µM **(C)**. **(B)** Graph represents

quantification of TDP-43 immunoreactivity and is expressed as percentage of time 0 (before

treatment), n=3 independent experiments (dots). Two-way Anova interaction p=0.4706, time

p=0.5997, scFv p=0.0306, \*p<0.05 versus empty transfected cells by Dunnett's multiple

comparison test. **(C)** Graph represents quantification of TDP-43 immunoreactivity and is expressed

as percentage of time 0 (before treatment), n=4-5 independent experiments (dots). Two-way Anova

interaction p=0.8520, time p=0.5777, scFv p=0.0272, \*p<0.05 versus empty transfected cells by

Dunnett's multiple comparison test. Empty, no scFv; CTR, 8H11 anti-GFP scFv. Graphs show

mean ± sem.

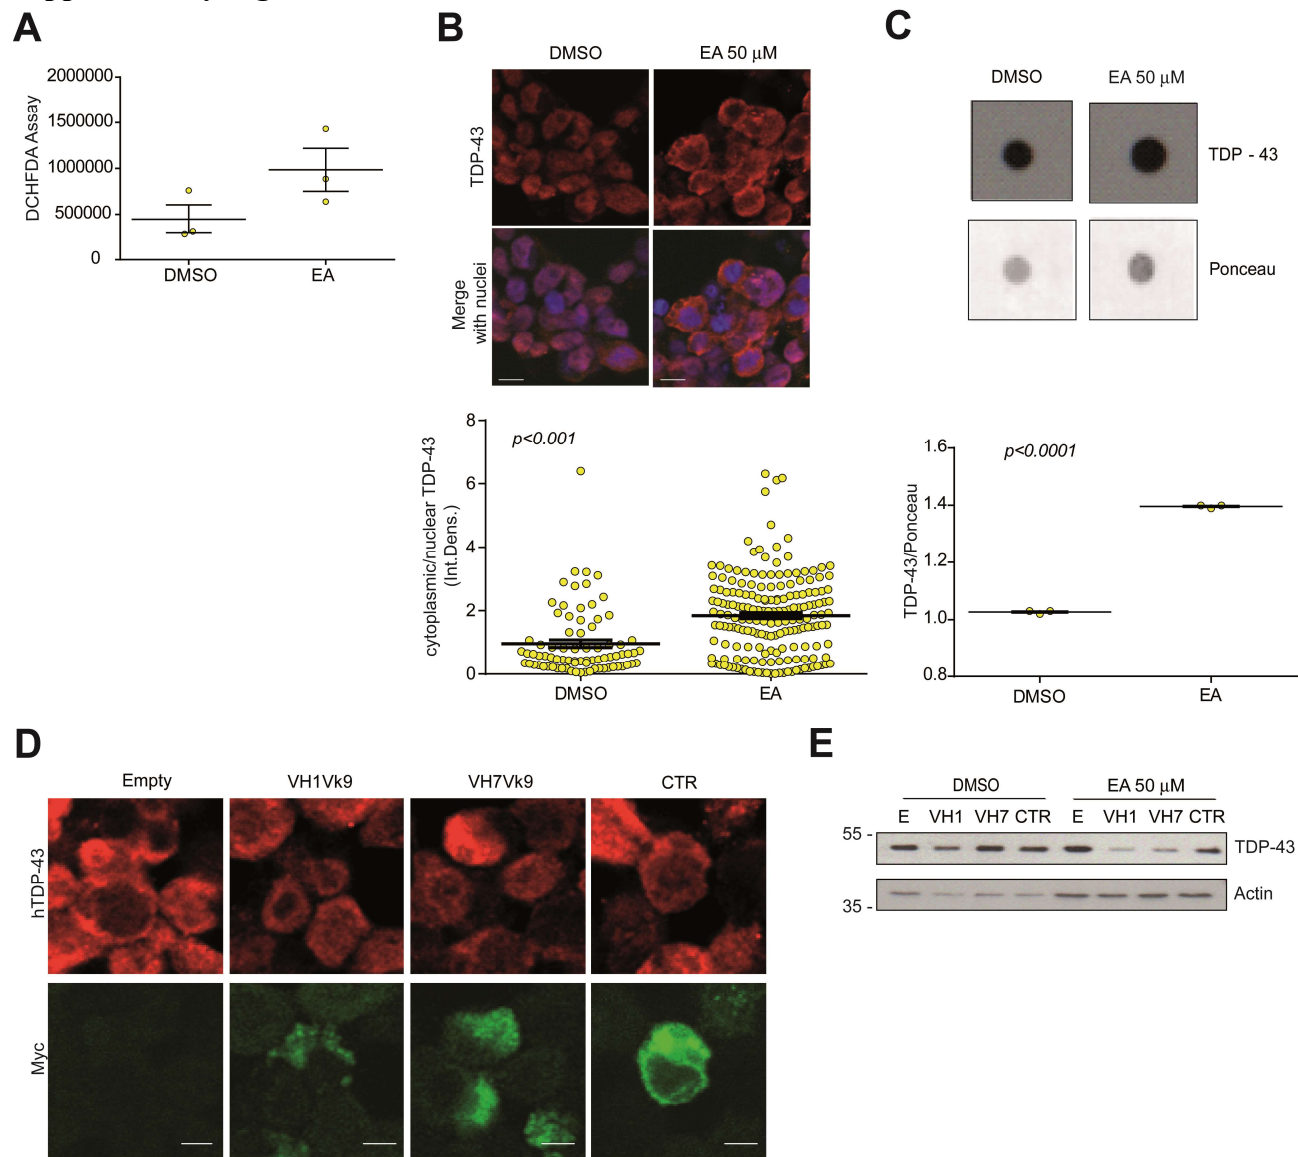

134  
135

136 **Suppl. Fig. 5 TDP-43 mislocalization and aggregation obtained in cells by ethacrynic acid**  
137 **treatment.** (A) Empty transfected cells were treated with 50  $\mu$ M ethacrynic acid (EA) or DMSO as  
138 vehicle. After 4 hours DCHFDA assay was performed to evaluate oxidative stress,  $p = 0.064$  by  
139 Student T-Test,  $n = 3$  samples per condition (dots). (B) Empty transfected cells were treated with 50  
140  $\mu$ M ethacrynic acid (EA) or DMSO as vehicle. Representative enlarged picture and quantification  
141 of TDP-43 mislocalization determined by quantification of TDP-43 integrated density in nuclear  
142 and cytoplasmic compartements. Data are TDP-43 cytoplasmic to nuclear ratio quantified in 100-  
143 200 cells per conditions (dots) from 2 independent experiments,  $p < 0.0001$  by unpaired T-Test.  
144 Scale bar = 20  $\mu$ m. (C) Representative picture and quantification of dot blot analysis of insoluble  
145 TDP-43 in transfected Hek293 cells treated with 50  $\mu$ M ethacrynic acid (EA). TDP-43  
146 immunoreactivity normalized on Ponceau from  $n = 3$  independent experiments (dots),  $p < 0.0001$  by  
147 unpaired T-Test. Spots were on the same membrane but were non-contiguous. (D) Representative  
148 images of single channels immunofluorescence for scFv (myc, green) and hTDP-43 (red)  
149 corresponding to merged images in figure 4A. Scale bar = 5  $\mu$ m. (E) Representative western blot of  
150 insoluble TDP-43 in DMSO or EA treated cells. Western was performed on a pool of 3  
151 experiments. Empty, no scFv; CTR, D1.3 scFv. Graph show mean  $\pm$  sem.

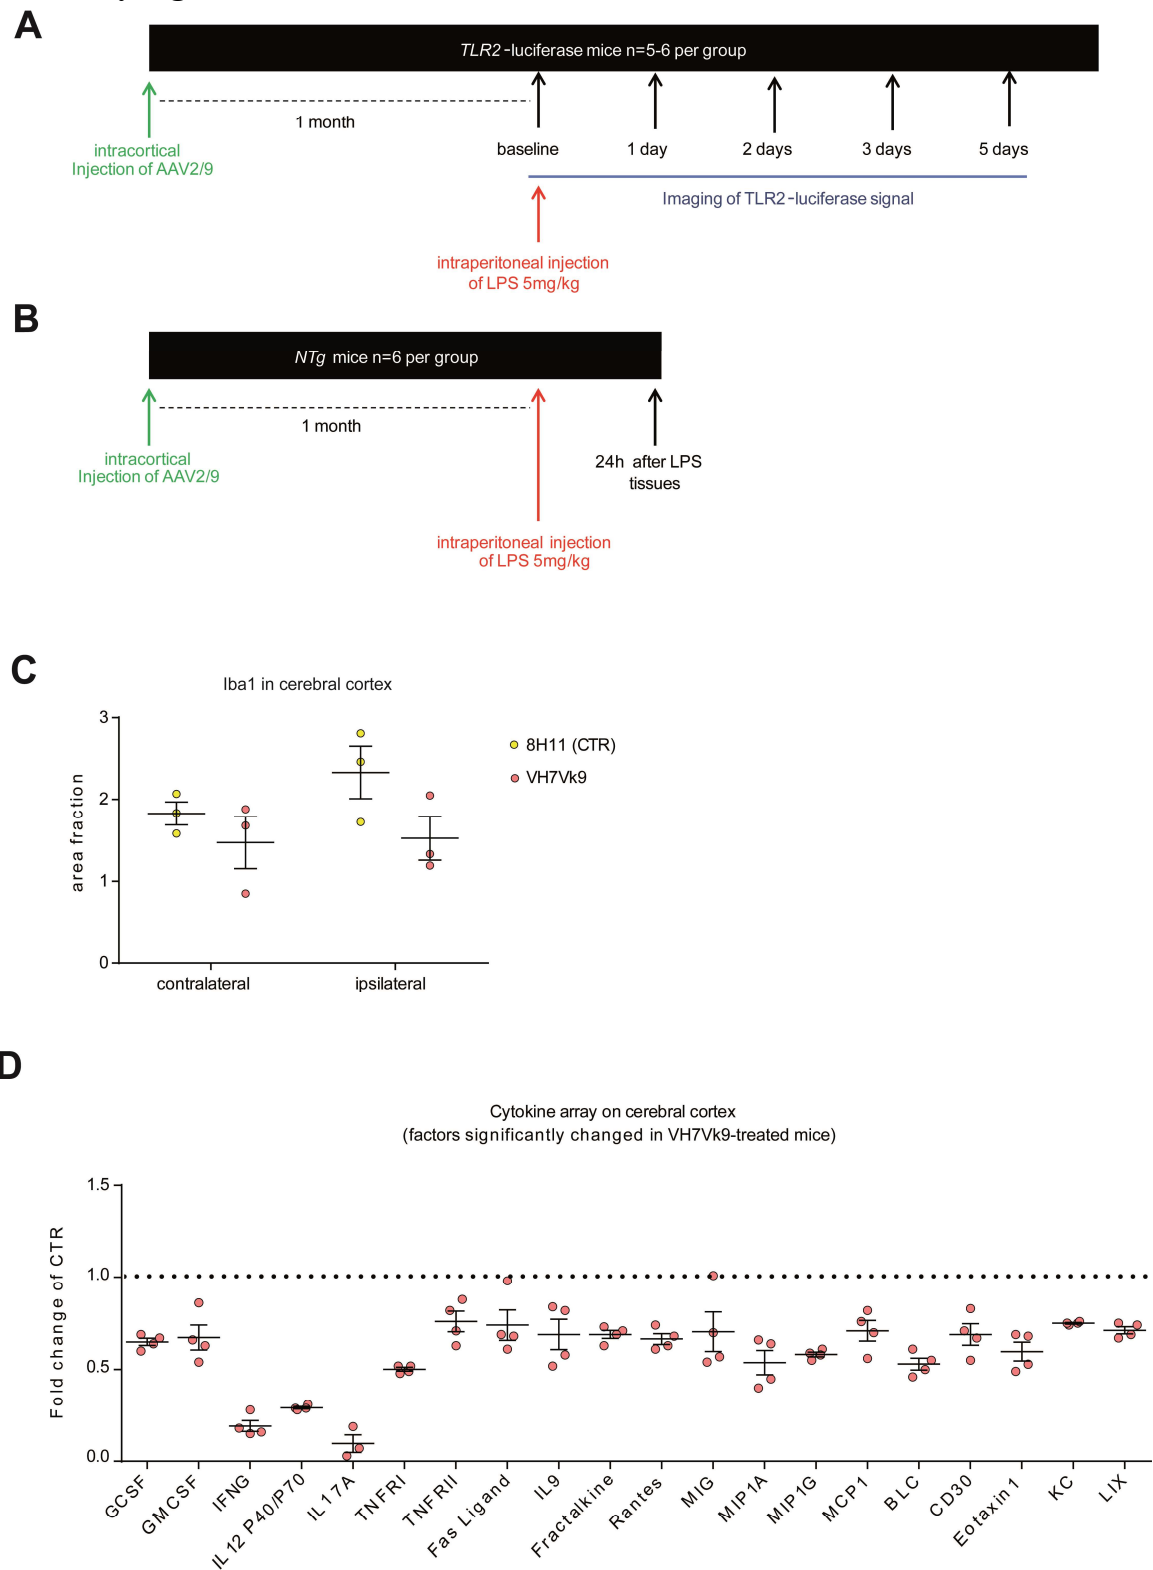

153 **Suppl. Fig. 6 Single chain antibody reduced LPS-induced inflammation in vivo. (A, B)**  
154 Schematic representation of the experiment in *TLR2*-luciferase mice (**A**) and non-transgenic (NTg)  
155 mice (**B**). (**A**) After 1 month from intracortical injection of scAAV2/9 virus, mice were imaged  
156 before (baseline) or after 1 to 5 days from intraperitoneal injection of LPS (5mg/Kg). (**B**) Ntg  
157 Ntg mouse tissues were collected after 24h from LPS injection. (**C**) Quantification of Iba1 area fraction  
158 in contra- and ipsilateral cortex of mice injected with scAAV2/9 and challenged with LPS. Graph  
159 represents quantification of total Iba1 staining (area fraction), n=3 independent mice (dots), Two-  
160 way Anova p=0.430. (**D**) Cytokine array was performed on ipsilateral cerebral cortices. Graph



162 represents quantification of significantly changed factors in VH7Vk9-injected compared to 8H11-  
 163 injected mice, n=3 independent mice pooled (array was run twice, dots) and expressed as fold of  
 164 control (CTR=1, dotted line). p<0.05 for all shown factors in VH7Vk9 versus control scFv by  
 165 unpaired T-Test. CTR, 8H11 anti-GFP scFv. Graphs show mean  $\pm$  sem.

166

167 **Supplementary Figure 7**

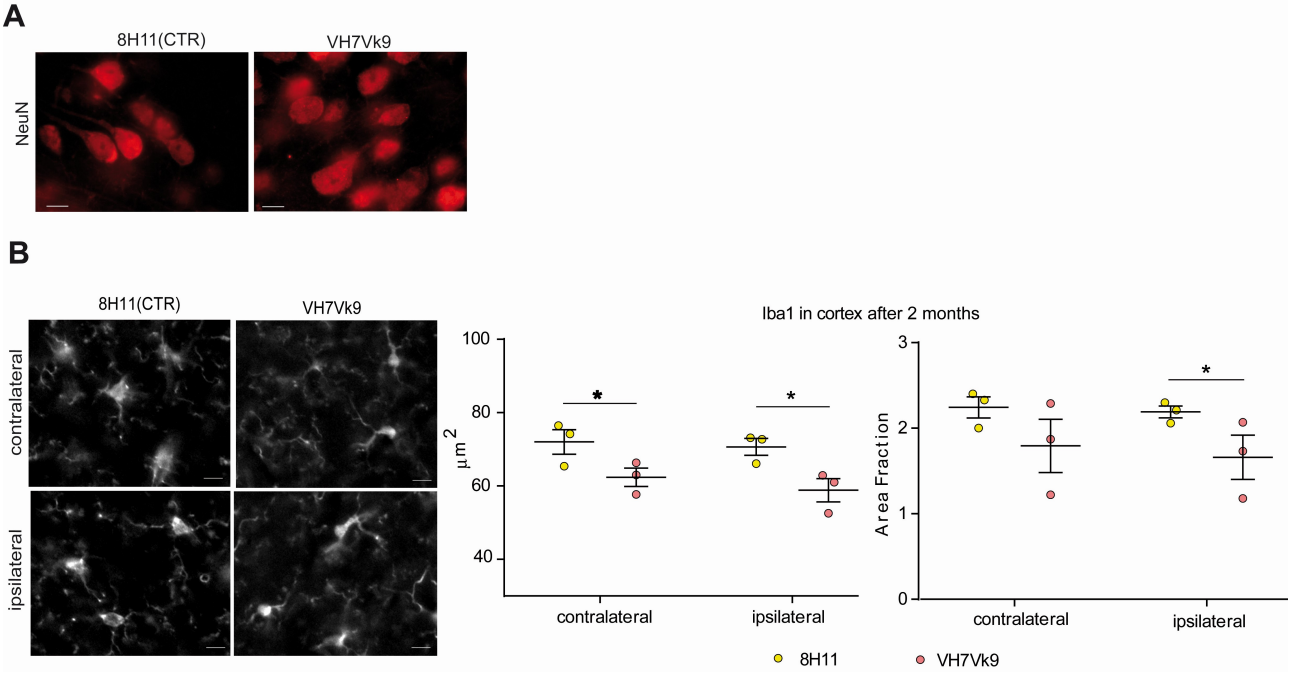

168

169

170 **Suppl. Fig. 7 scFv-mediated reduction of inflammation in TDP-43<sup>G348C</sup> mice after 2 months**  
 171 **from injection. (A)** Representative picture of the single channel immunofluorescence for NeuN  
 172 (red) in brain cortex corresponding to merged images in figure 6C, scale bar=20µm. **(B)**  
 173 Representative enlarged picture of Iba1 staining in cortex and relative quantification of cell body  
 174 size and area fraction, n=3 independent mice (dots). Two-way Anova for cell body size interaction  
 175 p=0.7145, hemisphere p=0.4211, scFv p=0.0057 and for area fraction: interaction p=0.8568,  
 176 hemisphere p=0.675, scFv p=0.0518, \*p<0.05 versus control scFv by uncorrected Fisher's LSD.  
 177 Scale bar=10µm. CTR, 8H11 anti-GFP scFv. Graphs show mean  $\pm$  sem.

178 **Supplementary Figure 8**

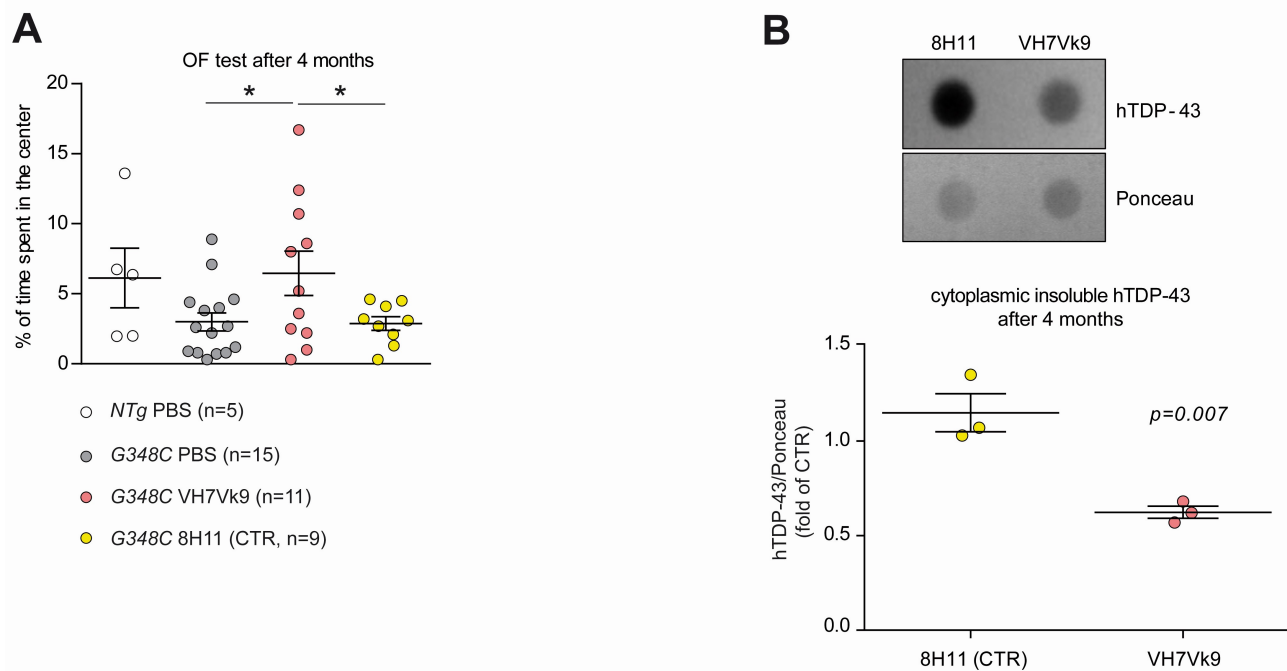

179  
180

181 **Suppl. Fig. 8** scAAV2/9-mediated delivery of scFv reduced anxiety and TDP-43 aggregation in  
182 **TDP-43<sup>G348C</sup> mice after 4 months from injection.** (A) Open field (OF) test after 4 months from  
183 injection. Graph show percentage of time spent in the center of the field and number of independent  
184 mice (dots) tested. One-way Anova  $p=0.0508$ ,  $*p<0.05$  by uncorrected Fisher's LSD. (B)  
185 Representative picture and quantification of insoluble cytoplasmic human TDP-43 in ipsilateral  
186 cortices of  $n=3$  independent mice (dots). TDP-43 immunoreactivity was normalized on Ponceau and  
187 values were expressed as fold of control scFv. Statistical analysis was made by unpaired T-test.  
188 CTR, 8H11 anti-GFP scFv. Graphs show mean  $\pm$  sem.

189 **Supplementary Figure 9**

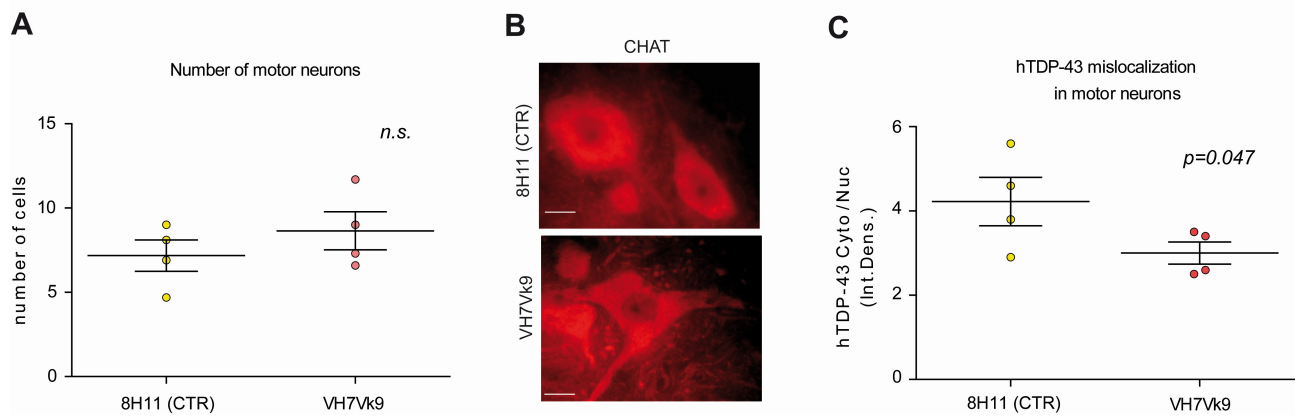

190  
191

192 **Suppl. Fig. 9 scAAV2/9-mediated delivery of scFv reduced TDP-43 mislocalization in motor**  
193 **neurons of TDP-43<sup>A315T</sup> mice after 2 months from injection. (A)** Quantification of motor neurons  
194 in lumbar spinal cord of mice injected with VH7Vk9 or CTR scFv. CHAT+ve cells larger than 250  
195  $\mu\text{m}^2$  were counted in n=4 independent mice (dots). Statistical analysis was made by unpaired T-test,  
196 n.s. not significant. **(B)** Representative picture of the single channel immunofluorescence for CHAT  
197 (red) in lumbar spinal cord corresponding to merged images in figure 7C, scale bar=20 $\mu\text{m}$ . **(C)**  
198 Quantification of human TDP-43 in motor neurons, stained with CHAT, of lumbar spinal cord.  
199 Cytoplasmic to nuclear ratio of TDP-43 in CHAT+ve cells (bigger than 250  $\mu\text{m}^2$ ) quantified in 4  
200 independent mice (dots). Statistical analysis was made by unpaired T-Test. CTR, 8H11 anti-GFP  
201 scFv. Graphs show mean  $\pm$  sem.



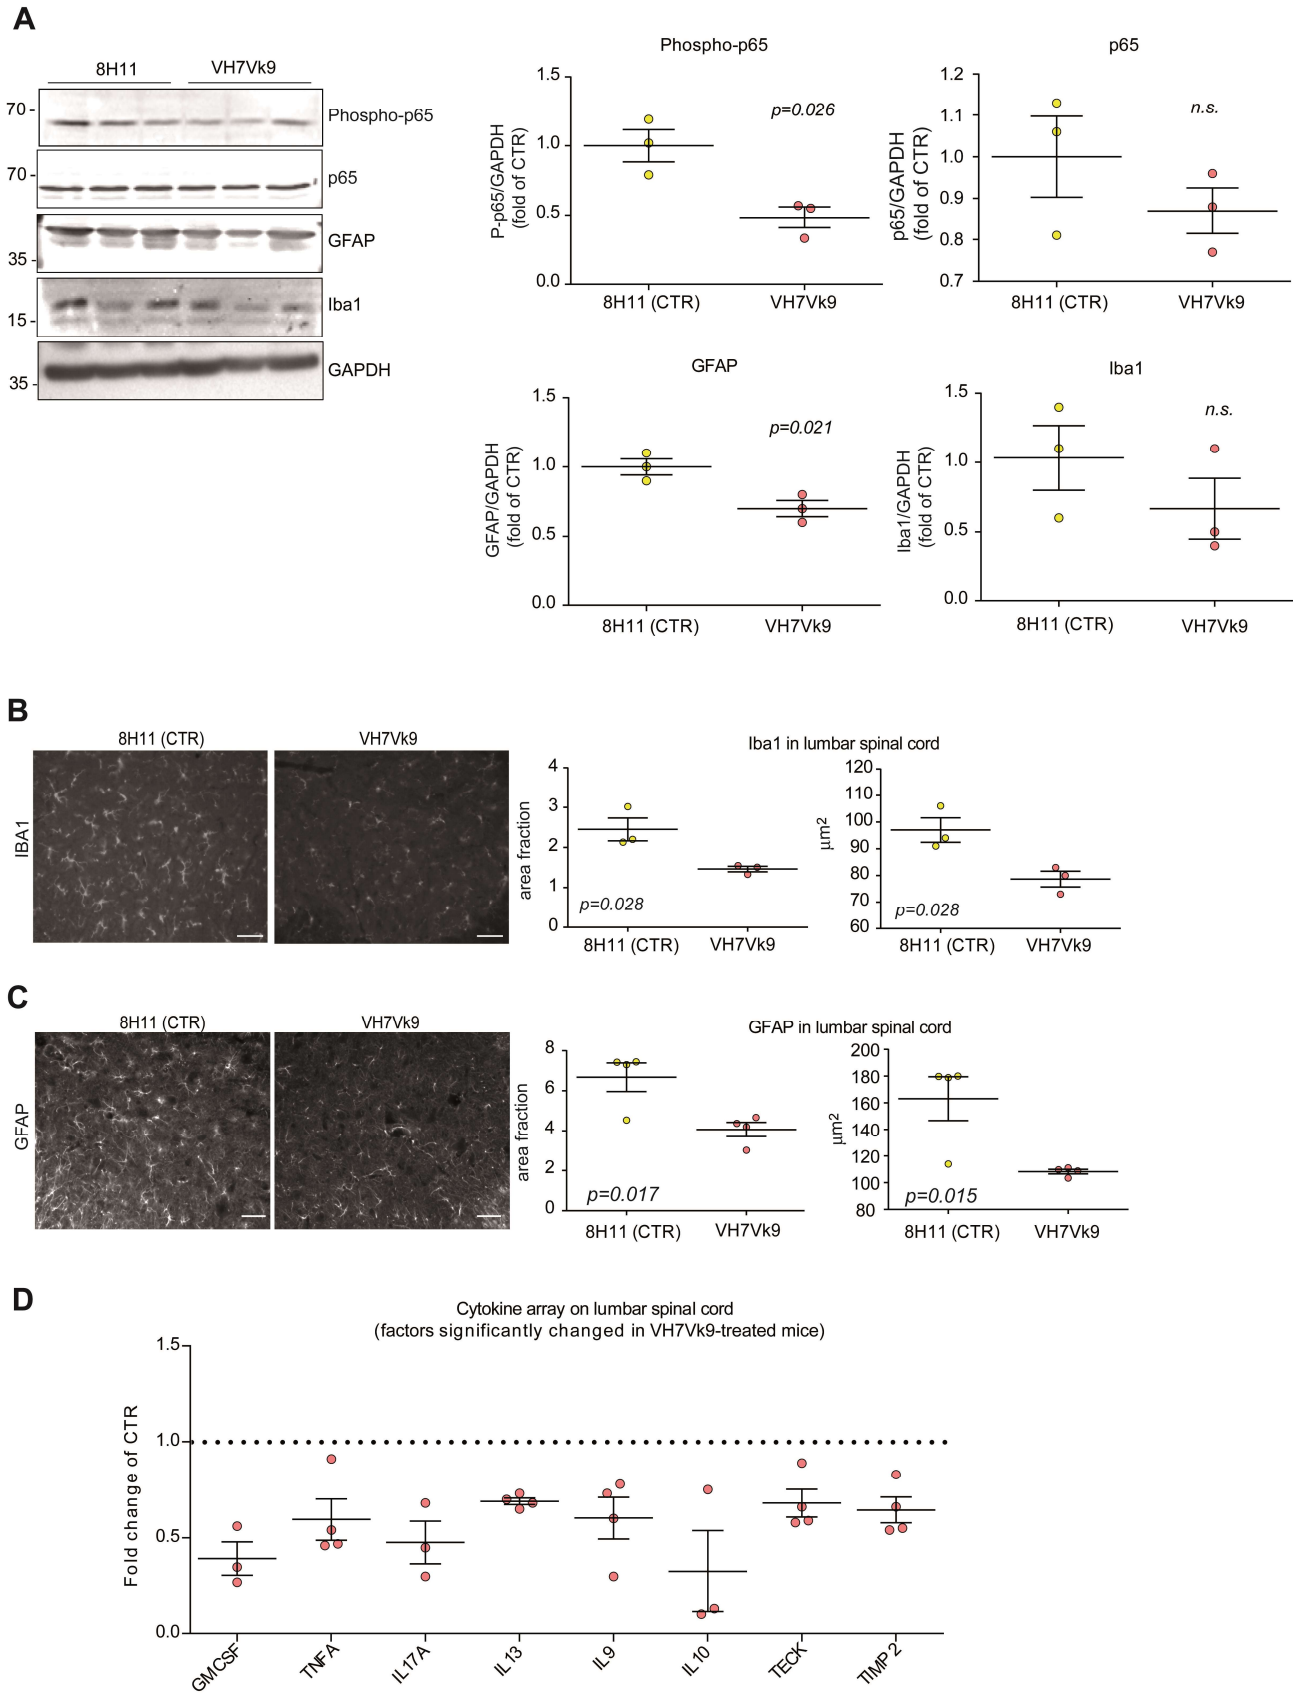

203 **Suppl. Fig. 10** scAAV2/9-mediated delivery of scFv reduced neuroinflammation in TDP-  
204 **43<sup>A315T</sup>** mice after 2 months from injection. (A) Representative picture and quantification of  
205 cytoplasmic phospho-p65, p65, GFAP and Iba1 in n=3 independent mice (dots) lumbar spinal  
206  
207

208 cords. Proteins immunoreactivity was normalized on GAPDH and values were expressed as fold of  
209 control scFv. Statistical analysis was made by unpaired T-test. **(B, C)** Representative picture of Iba1  
210 **(B)** or GFAP **(C)** staining in lumbar spinal cord and relative quantification of area fraction and cell  
211 body size in n=3 independent mice (dots). Statistical analysis was made by unpaired T-test, scale  
212 bar=50µm. **(D)** VH7Vk9 reduces NF-κB activity. Cytokine array was performed in lumbar spinal  
213 cords. Graph represents quantification of significantly changed factors in VH7Vk9-injected  
214 compared to 8H11-injected mice, n=3 independent mice pooled (array was run twice, dots) and  
215 expressed as fold of control (CTR=1, dotted line).  $p<0.05$  for all shown factors in VH7Vk9 versus  
216 control scFv by unpaired T-Test. CTR, 8H11 anti-GFP scFv. Graphs show mean  $\pm$  sem. n.s. not  
217 significant.

| <b>Antigen</b>                                             | <b>Antibody/clone</b>                | <b>WB<br/>dilution</b> | <b>IF<br/>dilution</b> | <b>Company</b>                                          | <b>Catalog<br/>number</b> |
|------------------------------------------------------------|--------------------------------------|------------------------|------------------------|---------------------------------------------------------|---------------------------|
| Actin                                                      | mouse<br>monoclonal/<br>clone C4     | 1 :10000               |                        | Millipore<br>(Temecula CA,<br>USA)                      | MAB1501                   |
| Choline<br>acetyltransferase<br>(CHAT)                     | rabbit polyclonal                    |                        | 1 :500                 | Millipore                                               | AB143                     |
| C-myc                                                      | mouse<br>monoclonal/<br>clone 9E10   | 1 :1000                |                        | Santa Cruz                                              | sc-40                     |
| C-myc-HRP<br>conjugated                                    | mouse<br>monoclonal/<br>clone 9E10   | 1 :1000                |                        | Abcam                                                   | ab62928                   |
| FUS/TLS                                                    | mouse<br>monoclonal                  | 1 :1000                |                        | Abcam                                                   | ab84078                   |
| Glial fibrillary acidic<br>protein (GFAP)                  | mouse<br>monoclonal/<br>clone GA5    | 1:5000                 | 1:500                  | Cell Signaling<br>Technologies<br>(Danvers, MA,<br>USA) | 3670                      |
| Glyceraldehyde 3-<br>phosphate<br>dehydrogenase<br>(GAPDH) | mouse<br>monoclonal/<br>clone 6C5    | 1:2000                 |                        | Santa Cruz<br>(Santa Cruz, CA,<br>USA)                  | sc-32233                  |
| Human TDP-43                                               | mouse<br>monoclonal/<br>clone 2E2-D3 | 1:1000                 | 1:500                  | Abnova<br>(Taipei City,<br>Taiwan)                      | H00023435-<br>M01         |

|                              |                                      |         |       |                                                 |            |
|------------------------------|--------------------------------------|---------|-------|-------------------------------------------------|------------|
| Iba1                         | rabbit polyclonal                    | 1:500   | 1:500 | Wako Chemicals<br>(Richmond, VA,<br>USA)        | 019-19741  |
| Lamin A/C                    | goat polyclonal                      | 1:500   |       | Santa Cruz                                      | sc-6215    |
| LC3                          | rabbit polyclonal                    |         | 1:500 | Novus<br>Biologicals<br>(Littleton,<br>CO, USA) | NB100-2220 |
| Myc-Tag-488<br>conjugated    | mouse<br>monoclonal/<br>clone 9E10   |         | 1:500 | Millipore                                       | 16-308     |
| Myc-Tag-biotin<br>conjugated | mouse<br>monoclonal/<br>clone 9E10   |         | 1:500 | Millipore                                       | 16-170     |
| Myc-Tag                      | rabbit polyclonal                    | 1:1000  |       | Abcam                                           | ab9106     |
| NeuN                         | rabbit<br>monoclonal/<br>clone D3S3I |         | 1:500 | Cell Signaling<br>Technologies                  | D3531      |
| Neurofilament H              | mouse<br>monoclonal/<br>clone N52    |         | 1:250 | Millipore                                       | MAB5266    |
| Neurofilament L              | mouse<br>monoclonal/<br>clone NR4    | 1 :1000 |       | Sigma                                           | N5139      |
| NFKB p65 subunit             | rabbit polyclonal                    | 1:1000  |       | Santa Cruz                                      | sc-372     |
| p84 nuclear membrane         | mouse<br>monoclonal/<br>clone 5E10   | 1:500   |       | Abcam<br>(Cambridge, UK)                        | ab487      |

|                                           |                                                    |        |           |                                                                         |            |
|-------------------------------------------|----------------------------------------------------|--------|-----------|-------------------------------------------------------------------------|------------|
| Pan-TDP-43<br>N-Term                      | rabbit polyclonal                                  | 1:5000 |           | Proteintech<br>(Chicago, IL,<br>USA)                                    | 10782-2-AP |
| Pan-TDP-43 C-Term                         | rabbit polyclonal                                  | 1:5000 |           | Proteintech<br>(Chicago, IL,<br>USA)                                    | 12892-2-AP |
| Peripherin                                | mouse<br>monoclonal                                | 1 :500 |           | MAB1527                                                                 | Millipore  |
| POLDIP3                                   | rabbit<br>monoclonal/<br>clone D65E8               | 1:1000 |           | Cell Signaling<br>Technologies                                          | 5439       |
| phospho (Ser 536)<br>NFKB p65 subunit     | mouse<br>monoclonal/<br>clone 7F1                  | 1:1000 |           | Cell Signaling<br>Technologies                                          | 3036S      |
| RRM1 TDP-43<br>(C10, G8 and E6)           | mouse<br>monoclonal/<br>clones 5C10,<br>55G8, 52E6 |        | 0.4 µg/ml | Medimabs<br>(Montreal, QC,<br>CA)                                       |            |
| Synaptic vesicle<br>protein 2 (SV-2)      | mouse<br>monoclonal/<br>clone unknown              |        | 1:25      | Developmental<br>Studies<br>Hybridoma Bank<br>(Mt.Prospect, IA,<br>USA) | AB_231587  |
| Trans-Golgi network<br>protein 46 (TGN46) | rabbit polyclonal                                  |        | 1:1000    | Abcam                                                                   | ab50595    |
| Ubiquitin                                 | rabbit polyclonal                                  |        | 1:1000    | Dako<br>(Glostrup,<br>Denmark)                                          | Z0458      |

219     **Supplementary References**

- 220     1.     Dutta K, Patel P, Rahimian R, Phaneuf D, and Julien JP. Withania somnifera Reverses  
221           Transactive Response DNA Binding Protein 43 Proteinopathy in a Mouse Model of  
222           Amyotrophic Lateral Sclerosis/Frontotemporal Lobar Degeneration. *Neurotherapeutics*.  
223           2017;14(2):447-62.
- 224     2.     Mishra PS, Vijayalakshmi K, Nalini A, Sathyaprabha TN, Kramer BW, Alladi PA, et al.  
225           Etiogenic factors present in the cerebrospinal fluid from amyotrophic lateral sclerosis  
226           patients induce predominantly pro-inflammatory responses in microglia. *J*  
227           *Neuroinflammation*. 2017;14(1):251.
- 228     3.     Gilda JE, and Gomes AV. Stain-Free total protein staining is a superior loading control to  
229           beta-actin for Western blots. *Anal Biochem*. 2013;440(2):186-8.
- 230     4.     Taylor SC, Berkelman T, Yadav G, and Hammond M. A defined methodology for reliable  
231           quantification of Western blot data. *Mol Biotechnol*. 2013;55(3):217-26.

232  
233
